# Supplementary material for: Single-species dinoflagellate cyst carbon isotope fractionation in from coretop sediments: environmental controls, CO 2 -dependency and proxy potential
Source: Copernicus journal article supplement (doi:10.5194/bg-2022-118), 2022-06-23
Supplement: Supplementary file 1 [file Supp data file d13C modern dinos.xlsx]

## Sheet: Averaged data
Sample ID	Area average (Vs)	d13C average (‰)	SE (‰)	Species	Latitude	Longitude	Water depth (m)	Collection year (CE)	SST (ºC; Gouretski&Koultermann 2004 Gridded)	SSS (psu)	PO4 (µmol/kg)	NO3 (µmol/kg)	Si (µmol/kg)	O2 (mL/L)	pCO2 measured (LDEO 2015)	pCO2 @ 1850CE	Alkalnity (µmol/kg)	d13CDIC (‰)	epCO2	epDIC
MC613	1.36789	-27.0939	0.174008	O. centrocarpum	35.8575	14.1056	989	1997.87	20.19	37.639	0.09	0.9	1.9	4.96	449.334	337.696	2431.4	2	19.58	29.09
MC614	0.611406	-25.9783	0.251504	O. centrocarpum	35.8075	12.9981	485	1997.87	20.48	37.474	0.11	1.2	2.3	4.95	446.963	335.496	2416.2	2	18.5	27.98
T89-15bx	0.638	-24.2581	0.417038	O. centrocarpum	-4.19937	10.05	1930	1989	25.33	33.58	0.18	1.4	3	4.79	401.29	318.647	2092.3	1.7	17.02	25.96
64PE428-6-6	0.5682	-23.0857	0.671181	O. centrocarpum	30.6792	-11.9305		2017	18.97	36.54	0.14	0.5	1.3	5.32	410.37	299.928	2363.4	1.4	14.83	24.49
NF2012-091	0.7	-23.7709	0.454606	O. centrocarpum	37.9774	-73.6694	1186	2013.29	17.42	34.123	0.32	1.3	2.8	5.56	409.243	297.776	2187.6	1.4	15.34	25.17
MC645	0.5045	-22.0785	0.262113	O. centrocarpum	40.2175	25.2442	1466	1997.93	17.95	37.11	0.08	0.6	2	5.31	404.932	296.193	2323.2	2	14.31	24.08
64PE428-1-6	0.583212	-21.9788	0.174908	O. centrocarpum	47.0798	-10.1973		2017	14.92	35.54	0.2	1.1	1.1	6	366.35	264.515	2296.4	1.5	13.35	23.48
PE360-24	0.841391	-24.7613	0.26889	O. centrocarpum	55.4962	-15.8008	549	2012.75	11.77	35.366	0.41	3.2	1.4	6.16	365.48	259.787	2314.4	1.4	15.65	26.16
PE360-45	0.417938	-24.1887	0.464855	O. centrocarpum	55.5394	-15.8453	745	2012.75	11.77	35.366	0.41	3.2	1.4	6.16	365.48	259.787	2314.4	1.4	15.08	25.59
PE275-6	0.619818	-22.5796	0.331773	O. centrocarpum	59.2724	-38.36	3036	2007	7.99	34.86	0.61	4.9	5.3	6.7	360.44	258.266	2165	1.6	13.21	24.18
PE275-9	0.617139	-22.9431	0.284063	O. centrocarpum	59.2724	-38.36	3036	2007	7.99	34.86	0.61	4.9	5.3	6.7	360.44	258.266	2165	1.6	13.57	24.54
ENAM97-04	0.66846	-23.6548	0.154248	O. centrocarpum	52.4104	-14.94	824	1997	12.82	35.42	0.3	2.5	1.3	6.13	357.18	250.134	2312.5	1.4	14.67	25.05
Omex93-A2 bx	0.71331	-22.7627	0.287299	O. centrocarpum	49.483	-11.13	208	1993	13.94	35.54	0.21	1.3	1.3	5.99	348.25	246.252	2301.1	1.4	13.92	24.16
ENAM93-08bx	0.596973	-24.3241	0.355791	O. centrocarpum	59.51	3.68	258	1994	10.11	35.29	0.32	3.9	2.5	6.76	344.08	242.573	2263.2	1.5	15.11	25.82
ENAM94-13bx	0.591333	-23.0701	0.281423	O. centrocarpum	60.25	-11.19	1170	1996	11.41	35.3	0.56	3.7	1.8	6.37	346.56	240.528	2316.6	1.5	14.02	24.57
ENAM96-09bx	0.520405	-22.9214	0.309345	O. centrocarpum	57.1599	-10.26	2252	1996	11.41	35.4	0.5	3.4	1.8	6.2	346.56	240.528	2306.6	1.5	13.87	24.42
LCD10A	0.955962	-24.1296	0.551727	O. centrocarpum	66.6774	-24.1796	241	2011.5	3.89	34.237	0.46	5.1	4.1	7.2	296.441	198.259	2236.5	1.6	14.24	25.73
NA87-02	0.992	-24.7793	0.373265	O. centrocarpum	64.48	-5.83	3127	1987.7	5.63	34.91	0.41	4	2.4	7.11	287.401	193.329	2322.5	1.6	15.11	26.38
LCD13	0.67088	-23.9524	0.210128	O. centrocarpum	67.5013	-15.0693	884	2011.5	3.98	34.522	0.4	4.1	3.5	7.69	283.91	184.238	2318	1.6	14.07	25.55
ENAM94-13bx	0.578833	-24.6178	0.203482	S. elongatus	60.25	-11.19	1170	1996	11.41	35.3	0.56	3.7	1.8	6.37	346.56	240.528	2316.6	1.5	15.57	26.12
ENAM97-04	0.561217	-23.194	0.31451	S. elongatus	52.4104	-14.94	824	1997	12.82	35.42	0.3	2.5	1.3	6.13	357.18	250.134	2312.5	1.4	14.21	24.59
Omex93-A2 bx	0.769333	-23.1079	0.644428	S. elongatus	49.483	-11.13	208	1993	13.94	35.54	0.21	1.3	1.3	5.99	348.25	246.252	2301.1	1.4	14.26	24.51
PE275-9	0.5708	-23.4554	0.537611	S. elongatus	59.2724	-38.36	3036	2007	7.99	34.86	0.61	4.9	5.3	6.7	360.44	258.266	2165	1.6	14.08	25.06
ENAM94-13bx	0.824083	-25.5152	0.28567	S. mirabilis	60.25	-11.19	1170	1996	11.41	35.3	0.56	3.7	1.8	6.37	346.56	240.528	2316.6	1.5	16.46	27.02
ENAM97-04	0.811081	-25.3494	0.248416	S. mirabilis	52.4104	-14.94	824	1997	12.82	35.42	0.3	2.5	1.3	6.13	357.18	250.134	2312.5	1.4	16.37	26.75
Omex93-A2 bx	0.677778	-22.1576	0.313071	S. mirabilis	49.483	-11.13	208	1993	13.94	35.54	0.21	1.3	1.3	5.99	348.25	246.252	2301.1	1.4	13.31	23.56
ENAM93-08bx	0.500548	-24.3647	0.266329	S. ramosus	59.51	3.68	258	1994	10.11	35.29	0.32	3.9	2.5	6.76	344.08	242.573	2263.2	1.5	15.15	25.86
ENAM96-09bx	0.58069	-25.2622	0.544283	S. ramosus	57.1599	-10.26	2252	1996	11.41	35.4	0.5	3.4	1.8	6.2	346.56	240.528	2306.6	1.5	16.21	26.76
Omex93-A2 bx	0.525636	-22.2116	0.294438	S. ramosus	49.483	-11.13	208	1993	13.94	35.54	0.21	1.3	1.3	5.99	348.25	246.252	2301.1	1.4	13.37	23.61
PE275-6	0.5595	-24.6623	0.546276	S. ramosus	59.2724	-38.36	3036	2007	7.99	34.86	0.61	4.9	5.3	6.7	360.44	258.266	2165	1.6	15.29	26.26
PE275-9	0.753091	-23.0822	0.281691	S. ramosus	59.2724	-38.36	3036	2007	7.99	34.86	0.61	4.9	5.3	6.7	360.44	258.266	2165	1.6	13.71	24.68
T89-15bx	0.574343	-24.5714	0.443816	S. ramosus	-4.19937	10.05	1930	1989	25.33	33.58	0.18	1.4	3	4.79	401.29	318.647	2092.3	1.7	17.34	26.27
64PE428-1-6	0.533241	-24.3723	0.492667	I.aculeatum	47.0798	-10.1973		2017	14.92	35.54	0.2	1.1	1.1	6	366.35	264.515	2296.4	1.5	15.74	25.87

## Sheet: Raw data
Sample ID	Species	Area (Vs)	measured d13C	adjusted d13C	Outlier/Below cut-off (0.2 Vs)
NF2012-091	Ocen	0.284	-24.81	-24.451
NF2012-091	Ocen	0.299	-23.55	-23.0172
NF2012-091	Ocen	0.31	-32.44	-33.2459	OUT
NF2012-091	Ocen	0.375	-25.36	-25.1642
NF2012-091	Ocen	0.398	-22.74	-22.264
NF2012-091	Ocen	0.461	-23.99	-23.704
NF2012-091	Ocen	0.463	-21.27	-20.7282
NF2012-091	Ocen	0.482	-22.36	-21.9401
NF2012-091	Ocen	0.485	-21.6	-21.1146
NF2012-091	Ocen	0.492	-23.73	-23.4406
NF2012-091	Ocen	0.545	-22.49	-22.1328
NF2012-091	Ocen	0.552	-27.74	-27.7978
NF2012-091	Ocen	0.607	-22.51	-22.1932
NF2012-091	Ocen	0.673	-23.88	-23.6828
NF2012-091	Ocen	0.675	-19.31	-18.8256
NF2012-091	Ocen	0.912	-25.93	-25.8809
NF2012-091	Ocen	1.006	-24.68	-24.5839
NF2012-091	Ocen	1.06	-26.8	-26.7922
NF2012-091	Ocen	1.182	-24	-23.8949
NF2012-091	Ocen	1.203	-22.82	-22.6762
NF2012-091	Ocen	1.221	-22.32	-22.1615
NF2012-091	Ocen	1.325	-27.3	-27.3093
PE360-24	Ocen	0.21	-30.27	-31.0394	OUT
PE360-24	Ocen	0.378	-26.07	-25.9599
PE360-24	Ocen	0.479	-22.81	-22.4282
PE360-24	Ocen	0.607	-27.31	-27.3319
PE360-24	Ocen	0.637	-24.37	-24.1938
PE360-24	Ocen	0.662	-24.79	-24.6479
PE360-24	Ocen	0.662	-26.92	-26.9149
PE360-24	Ocen	0.663	-24.91	-24.7758
PE360-24	Ocen	0.679	-25.81	-25.7355
PE360-24	Ocen	0.693	-25.42	-25.3232
PE360-24	Ocen	0.751	-26.51	-26.4824
PE360-24	Ocen	0.763	-24.55	-24.4145
PE360-24	Ocen	0.766	-22.81	-22.5791
PE360-24	Ocen	0.828	-24.21	-24.0684
PE360-24	Ocen	0.861	-24.15	-24.0111
PE360-24	Ocen	0.876	-24.45	-24.328
PE360-24	Ocen	0.919	-25.43	-25.3586
PE360-24	Ocen	0.933	-22.62	-22.4238
PE360-24	Ocen	1.013	-24.58	-24.4805
PE360-24	Ocen	1.034	-24.14	-24.0249
PE360-24	Ocen	1.106	-25.78	-25.7342
PE360-24	Ocen	1.307	-24.34	-24.256
PE360-24	Ocen	1.324	-24.73	-24.6593
PE360-24	Ocen	1.411	-22.8	-22.6775
PE360-45	Ocen	0.125	-27.43	-27.6324	BCO
PE360-45	Ocen	0.135	-23.42	-21.9126	BCO
PE360-45	Ocen	0.141	-28.1	-28.5356	BCO
PE360-45	Ocen	0.162	-28.82	-29.4167	BCO
PE360-45	Ocen	0.19	-22.6	-21.4267	BCO
PE360-45	Ocen	0.192	-24.66	-24.0442	BCO
PE360-45	Ocen	0.208	-24.76	-24.2267
PE360-45	Ocen	0.215	-32.47	-33.7203	OUT
PE360-45	Ocen	0.239	-25.52	-25.2225
PE360-45	Ocen	0.291	-20.81	-19.8235
PE360-45	Ocen	0.294	-24.5	-24.1063
PE360-45	Ocen	0.3	-27.3	-27.3462
PE360-45	Ocen	0.311	-25.17	-24.8999
PE360-45	Ocen	0.339	-25	-24.7324
PE360-45	Ocen	0.376	-25.3	-25.0976
PE360-45	Ocen	0.383	-22.27	-21.7184
PE360-45	Ocen	0.404	-23.13	-22.7047
PE360-45	Ocen	0.411	-24.04	-23.7209
PE360-45	Ocen	0.535	-26.54	-26.5028
PE360-45	Ocen	0.558	-20.62	-20.1273
PE360-45	Ocen	0.646	-24.62	-24.4629
PE360-45	Ocen	0.689	-22.72	-22.4562
PE360-45	Ocen	0.703	-24.72	-24.5824
NA87-02	Ocen	0.062	-31.4292	-39.4824	BCO
NA87-02	Ocen	0.063	-26.67	-26.0961	BCO
NA87-02	Ocen	0.089	-32.08	-36.2269	BCO
NA87-02	Ocen	0.136	-27.71	-28.0058	BCO
NA87-02	Ocen	0.155	-26.89	-26.8517	BCO
NA87-02	Ocen	0.295	-24.47	-24.0731
NA87-02	Ocen	0.296	-27.41	-27.4741
NA87-02	Ocen	0.31	-25.35	-25.1056
NA87-02	Ocen	0.381	-31.4473	-31.9689	OUT
NA87-02	Ocen	0.492	-23.04	-22.6896
NA87-02	Ocen	0.515	-23.86	-23.5956
NA87-02	Ocen	0.657	-23.76	-23.55
NA87-02	Ocen	0.676	-24.79	-24.651
NA87-02	Ocen	0.843	-26.55	-26.5276
NA87-02	Ocen	0.854	-26.09	-26.0453
NA87-02	Ocen	1.3	-26.19	-26.1643
NA87-02	Ocen	1.51	-23.92	-23.8362
NA87-02	Ocen	1.59	-23.72	-23.6354
NA87-02	Ocen	1.61	-25.06	-25.0106
NA87-02	Ocen	2.94	-22.7	-22.6407
LCD13	Ocen	0.253	-24.85	-24.4462
LCD13	Ocen	0.268	-25.36	-25.0723
LCD13	Ocen	0.282	-24.05	-23.5624
LCD13	Ocen	0.29	-24.65	-24.274
LCD13	Ocen	0.332	-24.53	-24.1916
LCD13	Ocen	0.346	-25.16	-24.9195
LCD13	Ocen	0.426	-25.53	-25.3777
LCD13	Ocen	0.428	-24.11	-23.8121
LCD13	Ocen	0.487	-23.58	-23.274
LCD13	Ocen	0.493	-22.87	-22.5053
LCD13	Ocen	0.497	-23.35	-23.0305
LCD13	Ocen	0.534	-23.02	-22.6977
LCD13	Ocen	0.553	-22.69	-22.3539
LCD13	Ocen	0.559	-22.9	-22.584
LCD13	Ocen	0.655	-24.1	-23.9114
LCD13	Ocen	0.806	-25.26	-25.1691
LCD13	Ocen	0.807	-22.69	-22.4652
LCD13	Ocen	0.863	-23.96	-23.8122
LCD13	Ocen	0.913	-25.97	-25.9228
LCD13	Ocen	0.931	-23.48	-23.322
LCD13	Ocen	1.083	-22.14	-21.9536
LCD13	Ocen	1.112	-23.01	-22.8611
LCD13	Ocen	1.243	-23.94	-23.8383
LCD13	Ocen	1.243	-22.85	-22.712
LCD13	Ocen	1.368	-24.76	-24.6925
LCD10A	Ocen	0.129	-18.54	-14.7378	BCO
LCD10A	Ocen	0.198	-20.83	-19.268	BCO
LCD10A	Ocen	0.244	-22.8	-21.9765
LCD10A	Ocen	0.269	-20.15	-18.9535
LCD10A	Ocen	0.294	-29.81	-30.2525
LCD10A	Ocen	0.344	-26.44	-26.3663
LCD10A	Ocen	0.409	-20.68	-19.9949
LCD10A	Ocen	0.501	-27.57	-27.6195
LCD10A	Ocen	0.504	-23.3	-22.981
LCD10A	Ocen	0.518	-25.64	-25.5262
LCD10A	Ocen	0.555	-23.34	-23.0557
LCD10A	Ocen	0.557	-19.79	-19.2322
LCD10A	Ocen	0.581	-25.19	-25.0562
LCD10A	Ocen	0.632	-27.8	-27.8541
LCD10A	Ocen	0.732	-27.99	-28.0472
LCD10A	Ocen	0.862	-23.54	-23.3716
LCD10A	Ocen	1.003	-24.81	-24.719
LCD10A	Ocen	1.022	-26.68	-26.667
LCD10A	Ocen	1.027	-23.78	-23.6495
LCD10A	Ocen	1.055	-24.87	-24.7861
LCD10A	Ocen	1.445	-22.43	-22.2999
LCD10A	Ocen	1.495	-24.43	-24.3593
LCD10A	Ocen	1.539	-19.79	-19.5976
LCD10A	Ocen	1.637	-22.02	-21.8953
LCD10A	Ocen	1.658	-28.22	-28.2502
LCD10A	Ocen	1.695	-22.93	-22.8316
LCD10A	Ocen	1.824	-22.83	-22.7365
LCD10A	Ocen	2.453	-20.54	-20.4329
LCD10A	Ocen	4.577	-32.22	-32.266
MC613	Ocen	0.762	-27.6468	-27.6826
MC613	Ocen	0.781	-27.4342	-27.4576
MC613	Ocen	0.863	-25.8392	-25.7828
MC613	Ocen	0.889	-28.2442	-28.3028
MC613	Ocen	0.979	-29.2372	-29.3325
MC613	Ocen	1.016	-27.7738	-27.8055
MC613	Ocen	1.021	-26.1032	-26.0666
MC613	Ocen	1.024	-26.5872	-26.5704
MC613	Ocen	1.028	-25.7322	-25.6809
MC613	Ocen	1.042	-27.3692	-27.3839
MC613	Ocen	1.072	-27.6494	-27.6746
MC613	Ocen	1.14	-27.7274	-27.7539
MC613	Ocen	1.243	-26.7738	-26.7663
MC613	Ocen	1.252	-25.1874	-25.1276
MC613	Ocen	1.255	-27.6402	-27.6613
MC613	Ocen	1.275	-28.4848	-28.5329
MC613	Ocen	1.319	-26.6764	-26.6663
MC613	Ocen	1.345	-28.9058	-28.9642
MC613	Ocen	1.373	-28.4258	-28.4686
MC613	Ocen	1.383	-27.5088	-27.524
MC613	Ocen	1.419	-26.6218	-26.6108
MC613	Ocen	1.432	-26.3864	-26.3688
MC613	Ocen	1.436	-26.8698	-26.8661
MC613	Ocen	1.455	-27.9758	-28.0034
MC613	Ocen	1.517	-27.6908	-27.7095
MC613	Ocen	1.555	-27.3322	-27.341
MC613	Ocen	1.556	-27.2292	-27.2352
MC613	Ocen	1.578	-27.1722	-27.1767
MC613	Ocen	1.593	-25.3068	-25.2632
MC613	Ocen	1.689	-25.9794	-25.9546
MC613	Ocen	1.694	-25.3278	-25.2874
MC613	Ocen	2.041	-25.9848	-25.9645
MC613	Ocen	2.047	-27.5478	-27.5587
MC613	Ocen	2.32	-26.1248	-26.1094
MC613	Ocen	2.482	-27.7908	-27.8038
MC614	Ocen	0.22	-24.341	-23.7501
MC614	Ocen	0.276	-27.7548	-27.8827
MC614	Ocen	0.296	-25.1513	-24.8624
MC614	Ocen	0.329	-28.259	-28.4333
MC614	Ocen	0.33	-24.5243	-24.1828
MC614	Ocen	0.332	-24.875	-24.5839
MC614	Ocen	0.338	-24.4703	-24.1307
MC614	Ocen	0.351	-26.9252	-26.9156
MC614	Ocen	0.352	-25.3933	-25.1873
MC614	Ocen	0.356	-27.022	-27.0248
MC614	Ocen	0.433	-32.2902	-32.8286	OUT
MC614	Ocen	0.458	-23.821	-23.5168
MC614	Ocen	0.471	-25.7312	-25.6134
MC614	Ocen	0.482	-23.7003	-23.4017
MC614	Ocen	0.523	-27.5832	-27.6315
MC614	Ocen	0.547	-25.3482	-25.2179
MC614	Ocen	0.561	-26.046	-25.9728
MC614	Ocen	0.576	-25.638	-25.5364
MC614	Ocen	0.585	-23.0513	-22.7615
MC614	Ocen	0.61	-26.3442	-26.2982
MC614	Ocen	0.624	-26.305	-26.2574
MC614	Ocen	0.651	-27.584	-27.6222
MC614	Ocen	0.71	-24.771	-24.6379
MC614	Ocen	0.717	-26.832	-26.8221
MC614	Ocen	0.724	-26.974	-26.9725
MC614	Ocen	0.786	-27.4422	-27.4659
MC614	Ocen	0.803	-27.5712	-27.6011
MC614	Ocen	0.83	-27.4478	-27.4705
MC614	Ocen	0.873	-26.0302	-25.9836
MC614	Ocen	0.964	-28.5612	-28.6288
MC614	Ocen	1.221	-25.8468	-25.8077
MC614	Ocen	1.259	-24.9192	-24.8509
MC614	Ocen	1.41	-25.0412	-24.984
MC645	Ocen	0.071	-21.5368	-14.4875	BCO
MC645	Ocen	0.11	-19.9924	-15.9881	BCO
MC645	Ocen	0.129	-27.8793	-28.2745	BCO
MC645	Ocen	0.139	-22.6404	-20.8789	BCO
MC645	Ocen	0.149	-24.7154	-23.877	BCO
MC645	Ocen	0.153	-24.8378	-24.0724	BCO
MC645	Ocen	0.175	-25.7254	-25.3477	BCO
MC645	Ocen	0.206	-23.5846	-22.7616
MC645	Ocen	0.23	-25.9883	-25.7753	OUT
MC645	Ocen	0.236	-22.458	-21.5311
MC645	Ocen	0.248	-24.7378	-24.3028	OUT
MC645	Ocen	0.269	-22.7918	-22.0567
MC645	Ocen	0.308	-22.4668	-21.7902
MC645	Ocen	0.316	-22.7534	-22.138
MC645	Ocen	0.32	-22.4274	-21.7742
MC645	Ocen	0.323	-21.5694	-20.8018
MC645	Ocen	0.333	-21.2734	-20.4916
MC645	Ocen	0.343	-22.0808	-21.4314
MC645	Ocen	0.411	-21.9314	-21.3849
MC645	Ocen	0.46	-21.0746	-20.5103
MC645	Ocen	0.465	-19.4028	-18.6878	OUT
MC645	Ocen	0.467	-22.3716	-21.938
MC645	Ocen	0.486	-23.3378	-23.0094
MC645	Ocen	0.511	-21.5698	-21.1086
MC645	Ocen	0.526	-21.6418	-21.2008
MC645	Ocen	0.597	-21.3926	-20.9899
MC645	Ocen	0.608	-21.3368	-20.938
MC645	Ocen	0.667	-20.2866	-19.8583
MC645	Ocen	0.694	-21.723	-21.4002
MC645	Ocen	0.711	-20.98	-20.6211
MC645	Ocen	1.029	-20.771	-20.5191
MC645	Ocen	1.138	-21.766	-21.5753
MC645	Ocen	1.215	-22.324	-22.1648
GeoB10709	Ocen	0.109	-27.842	-28.3301	BCO
GeoB10709	Ocen	0.119	-25.58	-24.861	BCO
GeoB10709	Ocen	0.148	-30.335	-31.5702	BCO
GeoB10709	Ocen	0.196	-23.2718	-22.3159	BCO
GeoB10709	Ocen	0.215	-22.067	-20.9395
GeoB10709	Ocen	0.303	-24.4578	-24.0712
GeoB10709	Ocen	0.312	-25.7568	-25.574
GeoB10709	Ocen	0.312	-27.627	-27.7192
GeoB10709	Ocen	0.398	-25.7028	-25.5579
GeoB10709	Ocen	0.416	-23.8208	-23.4826
GeoB10709	Ocen	0.546	-24.385	-24.1783
GeoB10709	Ocen	0.553	-27.0258	-27.0278
GeoB10709	Ocen	0.714	-20.541	-20.1577
GeoB10709	Ocen	0.831	-21.642	-21.3711
GeoB10709	Ocen	1.05	-22.363	-22.1794
ENAM93-08bx	Ocen	0.227	-32.0982	-33.1887	OUT
ENAM93-08bx	Ocen	0.257	-25.425	-25.1347
ENAM93-08bx	Ocen	0.29	-28.4122	-28.6382
ENAM93-08bx	Ocen	0.295	-25.4826	-25.2446
ENAM93-08bx	Ocen	0.318	-25.4846	-25.2666
ENAM93-08bx	Ocen	0.323	-30.163	-30.6101
ENAM93-08bx	Ocen	0.328	-26.2206	-26.1123
ENAM93-08bx	Ocen	0.334	-20.612	-19.7429
ENAM93-08bx	Ocen	0.337	-22.767	-22.1969
ENAM93-08bx	Ocen	0.398	-25.98	-25.866
ENAM93-08bx	Ocen	0.402	-23.671	-23.3032
ENAM93-08bx	Ocen	0.416	-24.132	-23.8269
ENAM93-08bx	Ocen	0.424	-27.597	-27.6592
ENAM93-08bx	Ocen	0.429	-27.7102	-27.7832
ENAM93-08bx	Ocen	0.436	-22.1482	-21.6581
ENAM93-08bx	Ocen	0.452	-23.5702	-23.2372
ENAM93-08bx	Ocen	0.467	-23.969	-23.6851
ENAM93-08bx	Ocen	0.468	-25.621	-25.4921
ENAM93-08bx	Ocen	0.471	-26.9062	-26.8975
ENAM93-08bx	Ocen	0.492	-23.087	-22.7407
ENAM93-08bx	Ocen	0.517	-24.436	-24.221
ENAM93-08bx	Ocen	0.561	-26.27	-26.214
ENAM93-08bx	Ocen	0.563	-23.8586	-23.6183
ENAM93-08bx	Ocen	0.602	-23.9126	-23.6929
ENAM93-08bx	Ocen	0.627	-24.096	-23.8981
ENAM93-08bx	Ocen	0.645	-22.3202	-22.0108
ENAM93-08bx	Ocen	0.656	-24.3256	-24.1519
ENAM93-08bx	Ocen	0.708	-23.4342	-23.2207
ENAM93-08bx	Ocen	0.76	-24.064	-23.9009
ENAM93-08bx	Ocen	0.783	-23.897	-23.7299
ENAM93-08bx	Ocen	0.784	-21.148	-20.8334
ENAM93-08bx	Ocen	0.793	-22.312	-22.063
ENAM93-08bx	Ocen	0.884	-26.3562	-26.3257
ENAM93-08bx	Ocen	0.884	-21.9022	-21.6606
ENAM93-08bx	Ocen	1.015	-23.074	-22.9129
ENAM93-08bx	Ocen	1.206	-21.972	-21.7995
ENAM93-08bx	Ocen	1.212	-22.2942	-22.1336
ENAM93-08bx	Ocen	1.551	-21.362	-21.2127
ENAM93-08bx	Sram	0.189	-24.4094	-23.7139	BCO
ENAM93-08bx	Sram	0.193	-23.0344	-21.9976	BCO
ENAM93-08bx	Sram	0.22	-21.8254	-20.6755
ENAM93-08bx	Sram	0.253	-23.732	-23.1183
ENAM93-08bx	Sram	0.262	-27.095	-27.1121
ENAM93-08bx	Sram	0.333	-22.8344	-22.2657
ENAM93-08bx	Sram	0.341	-25.8884	-25.7407
ENAM93-08bx	Sram	0.361	-25.5304	-25.3473
ENAM93-08bx	Sram	0.365	-26.509	-26.4486
ENAM93-08bx	Sram	0.375	-25.9274	-25.7993
ENAM93-08bx	Sram	0.386	-25.5844	-25.4207
ENAM93-08bx	Sram	0.393	-24.815	-24.5674
ENAM93-08bx	Sram	0.399	-24.6624	-24.4019
ENAM93-08bx	Sram	0.407	-24.477	-24.202
ENAM93-08bx	Sram	0.411	-24.0654	-23.749
ENAM93-08bx	Sram	0.428	-21.9384	-21.4166
ENAM93-08bx	Sram	0.442	-22.5164	-22.0703
ENAM93-08bx	Sram	0.444	-24.6884	-24.4595
ENAM93-08bx	Sram	0.48	-25.805	-25.6964
ENAM93-08bx	Sram	0.486	-23.855	-23.5729
ENAM93-08bx	Sram	0.527	-22.0214	-21.6125
ENAM93-08bx	Sram	0.552	-23.6264	-23.3628
ENAM93-08bx	Sram	0.553	-25.3954	-25.2703
ENAM93-08bx	Sram	0.562	-25.729	-25.6316
ENAM93-08bx	Sram	0.58	-23.267	-22.9905
ENAM93-08bx	Sram	0.616	-21.959	-21.6089
ENAM93-08bx	Sram	0.639	-24.221	-24.0354
ENAM93-08bx	Sram	0.717	-23.643	-23.4447
ENAM93-08bx	Sram	0.733	-23.055	-22.8273
ENAM93-08bx	Sram	0.783	-23.7084	-23.5312
ENAM93-08bx	Sram	0.816	-24.912	-24.8044
ENAM93-08bx	Sram	0.818	-26.571	-26.5489
ENAM93-08bx	Sram	0.835	-25.4464	-25.3682
ENAM94-13bx	Ocen	0.11	-26.1894	-25.7262	BCO
ENAM94-13bx	Ocen	0.192	-24.2264	-23.4965	BCO
ENAM94-13bx	Ocen	0.299	-25.995	-25.8398
ENAM94-13bx	Ocen	0.317	-19.3204	-18.2114	OUT
ENAM94-13bx	Ocen	0.318	-21.8932	-21.1584
ENAM94-13bx	Ocen	0.341	-24.1072	-23.7228
ENAM94-13bx	Ocen	0.349	-23.2442	-22.758
ENAM94-13bx	Ocen	0.399	-21.1552	-20.504
ENAM94-13bx	Ocen	0.438	-23.362	-22.9964
ENAM94-13bx	Ocen	0.452	-28.288	-28.413	OUT
ENAM94-13bx	Ocen	0.462	-24.2972	-24.041
ENAM94-13bx	Ocen	0.466	-24.0864	-23.8128
ENAM94-13bx	Ocen	0.494	-22.8524	-22.487
ENAM94-13bx	Ocen	0.496	-23.667	-23.3746
ENAM94-13bx	Ocen	0.501	-21.02	-20.5011
ENAM94-13bx	Ocen	0.506	-26.0942	-26.0164
ENAM94-13bx	Ocen	0.508	-21.0164	-20.505
ENAM94-13bx	Ocen	0.513	-22.095	-21.6802
ENAM94-13bx	Ocen	0.517	-26.3992	-26.3488
ENAM94-13bx	Ocen	0.584	-24.0172	-23.7979
ENAM94-13bx	Ocen	0.598	-23.434	-23.1784
ENAM94-13bx	Ocen	0.607	-22.714	-22.4116
ENAM94-13bx	Ocen	0.635	-25.316	-25.2028
ENAM94-13bx	Ocen	0.638	-22.5532	-22.2558
ENAM94-13bx	Ocen	0.64	-22.715	-22.4293
ENAM94-13bx	Ocen	0.662	-23.5762	-23.356
ENAM94-13bx	Ocen	0.681	-22.374	-22.0853
ENAM94-13bx	Ocen	0.725	-22.227	-21.9483
ENAM94-13bx	Ocen	0.733	-20.812	-20.4548
ENAM94-13bx	Ocen	0.784	-24.05	-23.8914
ENAM94-13bx	Ocen	0.812	-21.914	-21.6505
ENAM94-13bx	Ocen	0.829	-23.76	-23.5957
ENAM94-13bx	Ocen	0.868	-21.709	-21.4534
ENAM94-13bx	Ocen	0.886	-21.64	-21.3866
ENAM94-13bx	Ocen	0.896	-23.2872	-23.1137
ENAM94-13bx	Ocen	1.012	-24.6102	-24.5119
ENAM94-13bx	Selon	0.118	-29.9423	-31.4512	BCO
ENAM94-13bx	Selon	0.183	-25.9725	-25.6851	BCO
ENAM94-13bx	Selon	0.287	-24.5583	-24.1629
ENAM94-13bx	Selon	0.296	-24.1023	-23.6495
ENAM94-13bx	Selon	0.308	-25.9813	-25.8293
ENAM94-13bx	Selon	0.308	-26.8423	-26.8188
ENAM94-13bx	Selon	0.324	-24.026	-23.6071
ENAM94-13bx	Selon	0.336	-23.8374	-23.41
ENAM94-13bx	Selon	0.346	-24.8963	-24.6213
ENAM94-13bx	Selon	0.367	-26.7563	-26.7265
ENAM94-13bx	Selon	0.377	-29.3174	-29.5925	OUT
ENAM94-13bx	Selon	0.377	-23.4485	-23.027
ENAM94-13bx	Selon	0.412	-29.7834	-30.0827	OUT
ENAM94-13bx	Selon	0.414	-25.2864	-25.1031
ENAM94-13bx	Selon	0.426	-24.4754	-24.2138
ENAM94-13bx	Selon	0.433	-26.0014	-25.8998
ENAM94-13bx	Selon	0.441	-24.6074	-24.3687
ENAM94-13bx	Selon	0.484	-23.9694	-23.6964
ENAM94-13bx	Selon	0.49	-25.2085	-25.0493
ENAM94-13bx	Selon	0.507	-24.3173	-24.0875
ENAM94-13bx	Selon	0.522	-26.453	-26.4076
ENAM94-13bx	Selon	0.573	-24.0804	-23.8613
ENAM94-13bx	Selon	0.581	-23.7425	-23.5016
ENAM94-13bx	Selon	0.591	-23.52	-23.2674
ENAM94-13bx	Selon	0.631	-24.4514	-24.2789
ENAM94-13bx	Selon	0.668	-24.668	-24.5195
ENAM94-13bx	Selon	0.694	-25.4194	-25.3227
ENAM94-13bx	Selon	0.75	-22.9635	-22.7361
ENAM94-13bx	Selon	0.759	-23.953	-23.7835
ENAM94-13bx	Selon	0.782	-23.0604	-22.848
ENAM94-13bx	Selon	0.83	-22.6813	-22.4626
ENAM94-13bx	Selon	0.854	-23.8185	-23.6622
ENAM94-13bx	Selon	1.284	-25.8923	-25.8567
ENAM94-13bx	Selon	1.702	-25.517	-25.4813
ENAM94-13bx	Smira	0.171	-26.114	-25.8435	BCO
ENAM94-13bx	Smira	0.27	-25.434	-25.1617
ENAM94-13bx	Smira	0.341	-25.134	-24.886
ENAM94-13bx	Smira	0.382	-26.7	-26.6649
ENAM94-13bx	Smira	0.402	-27.468	-27.5197
ENAM94-13bx	Smira	0.409	-24.061	-23.7424
ENAM94-13bx	Smira	0.583	-24.937	-24.785
ENAM94-13bx	Smira	0.626	-24.721	-24.5654
ENAM94-13bx	Smira	0.702	-26.363	-26.3245
ENAM94-13bx	Smira	1.007	-25.3425	-25.2739
ENAM94-13bx	Smira	1.55	-24.933	-24.8782
ENAM94-13bx	Smira	1.751	-24.759	-24.7066
ENAM94-13bx	Smira	1.866	-26.33	-26.3153
ENAM96-09bx	Ocen	0.177	-21.9438	-20.4675	BCO
ENAM96-09bx	Ocen	0.22	-20.7328	-19.3401
ENAM96-09bx	Ocen	0.229	-28.3868	-28.6803	OUT
ENAM96-09bx	Ocen	0.265	-22.6543	-21.8817
ENAM96-09bx	Ocen	0.266	-25.1228	-24.7906
ENAM96-09bx	Ocen	0.31	-23.4593	-22.9348
ENAM96-09bx	Ocen	0.332	-27.6068	-27.6899
ENAM96-09bx	Ocen	0.35	-24.8484	-24.5708
ENAM96-09bx	Ocen	0.365	-22.2623	-21.6792
ENAM96-09bx	Ocen	0.371	-23.5578	-23.1418
ENAM96-09bx	Ocen	0.374	-26.1228	-26.0177
ENAM96-09bx	Ocen	0.414	-20.0134	-19.2662
ENAM96-09bx	Ocen	0.425	-22.8398	-22.4076
ENAM96-09bx	Ocen	0.43	-25.6548	-25.5168
ENAM96-09bx	Ocen	0.442	-23.2048	-22.8272
ENAM96-09bx	Ocen	0.444	-22.3768	-21.9191
ENAM96-09bx	Ocen	0.444	-24.4328	-24.1786
ENAM96-09bx	Ocen	0.463	-25.7608	-25.6436
ENAM96-09bx	Ocen	0.478	-23.1034	-22.7475
ENAM96-09bx	Ocen	0.48	-22.8494	-22.4721
ENAM96-09bx	Ocen	0.483	-19.9038	-19.2631
ENAM96-09bx	Ocen	0.486	-21.8264	-21.3624
ENAM96-09bx	Ocen	0.509	-25.2108	-25.0582
ENAM96-09bx	Ocen	0.517	-21.8708	-21.4407
ENAM96-09bx	Ocen	0.526	-21.3164	-20.8486
ENAM96-09bx	Ocen	0.537	-21.5334	-21.0934
ENAM96-09bx	Ocen	0.539	-22.0268	-21.6281
ENAM96-09bx	Ocen	0.57	-20.5658	-20.0802
ENAM96-09bx	Ocen	0.603	-21.5644	-21.1782
ENAM96-09bx	Ocen	0.611	-21.7138	-21.3435
ENAM96-09bx	Ocen	0.614	-22.9594	-22.6778
ENAM96-09bx	Ocen	0.633	-24.3104	-24.129
ENAM96-09bx	Ocen	0.644	-22.5534	-22.2589
ENAM96-09bx	Ocen	0.742	-24.7058	-24.5751
ENAM96-09bx	Ocen	0.755	-21.1708	-20.8447
ENAM96-09bx	Ocen	0.841	-22.8888	-22.6835
ENAM96-09bx	Ocen	0.865	-22.2468	-22.0163
ENAM96-09bx	Ocen	0.895	-19.2428	-18.8799
ENAM96-09bx	Ocen	1.012	-23.8764	-23.7479
ENAM96-09bx	Sram	0.148	-26.768	-26.6821	BCO
ENAM96-09bx	Sram	0.216	-28.4415	-28.7691
ENAM96-09bx	Sram	0.225	-28.706	-29.0749
ENAM96-09bx	Sram	0.267	-24.5768	-24.1498
ENAM96-09bx	Sram	0.286	-26.4875	-26.4042
ENAM96-09bx	Sram	0.291	-31.8952	-32.6753
ENAM96-09bx	Sram	0.293	-30.5572	-31.1196
ENAM96-09bx	Sram	0.318	-27.8782	-28.0046
ENAM96-09bx	Sram	0.345	-26.0252	-25.8974
ENAM96-09bx	Sram	0.422	-22.204	-21.7018
ENAM96-09bx	Sram	0.43	-28.6066	-28.7714
ENAM96-09bx	Sram	0.434	-27.3728	-27.4106
ENAM96-09bx	Sram	0.479	-24.3868	-24.1487
ENAM96-09bx	Sram	0.481	-22.7166	-22.3281
ENAM96-09bx	Sram	0.488	-26.191	-26.1188
ENAM96-09bx	Sram	0.503	-21.687	-21.228
ENAM96-09bx	Sram	0.507	-22.343	-21.9441
ENAM96-09bx	Sram	0.514	-25.2648	-25.1184
ENAM96-09bx	Sram	0.523	-28.9855	-29.1499
ENAM96-09bx	Sram	0.543	-23.253	-22.955
ENAM96-09bx	Sram	0.596	-25.258	-25.1327
ENAM96-09bx	Sram	0.651	-23.3516	-23.1128
ENAM96-09bx	Sram	0.72	-21.297	-20.9615
ENAM96-09bx	Sram	0.749	-21.5506	-21.2432
ENAM96-09bx	Sram	0.782	-22.954	-22.7359
ENAM96-09bx	Sram	0.795	-26.3772	-26.3442
ENAM96-09bx	Sram	0.957	-22.5356	-22.3409
ENAM96-09bx	Sram	1.155	-26.5188	-26.5015
ENAM96-09bx	Sram	1.432	-23.554	-23.455
ENAM96-09bx	Sram	1.438	-21.6296	-21.4759
ENAM97-04	Ocen	0.197	-24.9998	-24.4902	BCO
ENAM97-04	Ocen	0.209	-24.488	-23.8934
ENAM97-04	Ocen	0.276	-25.102	-24.7803
ENAM97-04	Ocen	0.292	-27.812	-27.9409	OUT
ENAM97-04	Ocen	0.3	-21.139	-20.2373
ENAM97-04	Ocen	0.321	-26.104	-25.9765
ENAM97-04	Ocen	0.356	-24.4112	-24.0835
ENAM97-04	Ocen	0.371	-21.163	-20.4576
ENAM97-04	Ocen	0.401	-24.8128	-24.5705
ENAM97-04	Ocen	0.415	-24.486	-24.2178
ENAM97-04	Ocen	0.432	-23.799	-23.4724
ENAM97-04	Ocen	0.441	-24.9372	-24.7314
ENAM97-04	Ocen	0.452	-25.1448	-24.9647
ENAM97-04	Ocen	0.452	-22.8758	-22.4754
ENAM97-04	Ocen	0.46	-23.9288	-23.6363
ENAM97-04	Ocen	0.474	-24.6638	-24.4485
ENAM97-04	Ocen	0.504	-25.2238	-25.0707
ENAM97-04	Ocen	0.508	-23.8128	-23.5404
ENAM97-04	Ocen	0.512	-22.1808	-21.7724
ENAM97-04	Ocen	0.525	-24.482	-24.2743
ENAM97-04	Ocen	0.531	-23.0748	-22.755
ENAM97-04	Ocen	0.543	-22.1308	-21.7436
ENAM97-04	Ocen	0.548	-23.4558	-23.1767
ENAM97-04	Ocen	0.558	-22.7728	-22.4464
ENAM97-04	Ocen	0.571	-23.711	-23.4632
ENAM97-04	Ocen	0.603	-23.698	-23.4634
ENAM97-04	Ocen	0.619	-23.59	-23.3544
ENAM97-04	Ocen	0.648	-22.89	-22.6196
ENAM97-04	Ocen	0.658	-22.796	-22.5239
ENAM97-04	Ocen	0.661	-24.007	-23.8142
ENAM97-04	Ocen	0.663	-22.6168	-22.3354
ENAM97-04	Ocen	0.671	-23.968	-23.7758
ENAM97-04	Ocen	0.673	-24.3708	-24.2047
ENAM97-04	Ocen	0.697	-23.1498	-22.9154
ENAM97-04	Ocen	0.724	-22.0238	-21.7328
ENAM97-04	Ocen	0.733	-24.1572	-23.9931
ENAM97-04	Ocen	0.768	-24.2478	-24.0966
ENAM97-04	Ocen	0.771	-23.9928	-23.8282
ENAM97-04	Ocen	0.778	-24.3008	-24.1545
ENAM97-04	Ocen	0.808	-22.3608	-22.1192
ENAM97-04	Ocen	0.914	-24.2018	-24.0737
ENAM97-04	Ocen	0.916	-22.7538	-22.5599
ENAM97-04	Ocen	0.932	-23.1038	-22.9291
ENAM97-04	Ocen	0.95	-24.3248	-24.2072
ENAM97-04	Ocen	0.954	-22.287	-22.0807
ENAM97-04	Ocen	0.955	-22.7428	-22.5567
ENAM97-04	Ocen	0.997	-25.6118	-25.5538
ENAM97-04	Ocen	1.063	-23.0422	-22.8874
ENAM97-04	Ocen	1.067	-24.307	-24.2021
ENAM97-04	Ocen	1.178	-24.4782	-24.3896
ENAM97-04	Ocen	1.358	-23.1282	-23.0107
ENAM97-04	Ocen	1.504	-22.6878	-22.57
ENAM97-04	Selon	0.255	-24.1384	-23.606
ENAM97-04	Selon	0.293	-26.4858	-26.4045
ENAM97-04	Selon	0.328	-25.7654	-25.5939
ENAM97-04	Selon	0.363	-22.071	-21.4606
ENAM97-04	Selon	0.383	-21.6176	-20.9899
ENAM97-04	Selon	0.395	-20.9838	-20.3059
ENAM97-04	Selon	0.403	-24.0644	-23.7409
ENAM97-04	Selon	0.425	-23.5736	-23.2176
ENAM97-04	Selon	0.443	-22.5556	-22.1145
ENAM97-04	Selon	0.445	-23.9678	-23.6683
ENAM97-04	Selon	0.446	-23.7166	-23.3931
ENAM97-04	Selon	0.51	-25.2734	-25.1265
ENAM97-04	Selon	0.527	-22.7168	-22.365
ENAM97-04	Selon	0.536	-23.8716	-23.6193
ENAM97-04	Selon	0.587	-23.8088	-23.5754
ENAM97-04	Selon	0.606	-23.2124	-22.9447
ENAM97-04	Selon	0.612	-23.6216	-23.3853
ENAM97-04	Selon	0.623	-23.9928	-23.7865
ENAM97-04	Selon	0.635	-22.366	-22.0545
ENAM97-04	Selon	0.638	-21.9854	-21.65
ENAM97-04	Selon	0.81	-21.872	-21.6056
ENAM97-04	Selon	1.247	-20.527	-20.3125
ENAM97-04	Selon	1.398	-21.275	-21.1064
ENAM97-04	Smira	0.306	-26.6898	-26.6432
ENAM97-04	Smira	0.34	-29.6595	-30.0141
ENAM97-04	Smira	0.353	-25.6575	-25.4859
ENAM97-04	Smira	0.356	-23.3018	-22.8337
ENAM97-04	Smira	0.452	-26.659	-26.6259
ENAM97-04	Smira	0.491	-25.1974	-25.0375
ENAM97-04	Smira	0.492	-23.0604	-22.7118
ENAM97-04	Smira	0.509	-24.4964	-24.2829
ENAM97-04	Smira	0.521	-23.4828	-23.1903
ENAM97-04	Smira	0.555	-24.1298	-23.9069
ENAM97-04	Smira	0.58	-25.2882	-25.1614
ENAM97-04	Smira	0.602	-24.403	-24.2182
ENAM97-04	Smira	0.625	-24.6512	-24.4906
ENAM97-04	Smira	0.634	-25.607	-25.5132
ENAM97-04	Smira	0.636	-25.0495	-24.9186
ENAM97-04	Smira	0.639	-26.674	-26.6522
ENAM97-04	Smira	0.665	-25.0154	-24.8884
ENAM97-04	Smira	0.673	-24.24	-24.0656
ENAM97-04	Smira	0.709	-25.7154	-25.6386
ENAM97-04	Smira	0.714	-24.9698	-24.8493
ENAM97-04	Smira	0.729	-28.8134	-28.9187
ENAM97-04	Smira	0.738	-26.7804	-26.7678
ENAM97-04	Smira	0.738	-26.3702	-26.3341
ENAM97-04	Smira	0.849	-27.9614	-28.0089
ENAM97-04	Smira	0.851	-27.1484	-27.1557
ENAM97-04	Smira	0.925	-22.9222	-22.7379
ENAM97-04	Smira	0.943	-30.2584	-30.4027	OUT
ENAM97-04	Smira	1.034	-25.1785	-25.1052
ENAM97-04	Smira	1.069	-26.7984	-26.7906
ENAM97-04	Smira	1.112	-24.5628	-24.4719
ENAM97-04	Smira	1.112	-24.4292	-24.3333
ENAM97-04	Smira	1.192	-24.4852	-24.3979
ENAM97-04	Smira	1.254	-24.3472	-24.2598
ENAM97-04	Smira	1.281	-24.191	-24.1005
ENAM97-04	Smira	1.285	-23.8672	-23.7665
ENAM97-04	Smira	1.459	-25.2702	-25.2214
ENAM97-04	Smira	1.48	-25.4172	-25.3732
ENAM97-04	Smira	2.05	-25.4362	-25.4051
Omex93-A2 bx	Ocen	0.165	-23.3456	-22.1762	BCO
Omex93-A2 bx	Ocen	0.299	-23.1722	-22.581
Omex93-A2 bx	Ocen	0.47	-21.3845	-20.8621
Omex93-A2 bx	Ocen	0.479	-21.4006	-20.8904
Omex93-A2 bx	Ocen	0.49	-20.4145	-19.8291
Omex93-A2 bx	Ocen	0.506	-25.2192	-25.0663
Omex93-A2 bx	Ocen	0.54	-20.7092	-20.2059
Omex93-A2 bx	Ocen	0.548	-22.6645	-22.3231
Omex93-A2 bx	Ocen	0.55	-24.5474	-24.355
Omex93-A2 bx	Ocen	0.559	-23.1665	-22.871
Omex93-A2 bx	Ocen	0.614	-22.7482	-22.4519
Omex93-A2 bx	Ocen	0.633	-24.7352	-24.5824
Omex93-A2 bx	Ocen	0.673	-24.8732	-24.7388
Omex93-A2 bx	Ocen	0.713	-19.9956	-19.5793
Omex93-A2 bx	Ocen	0.739	-22.3774	-22.1129
Omex93-A2 bx	Ocen	0.742	-23.8542	-23.675
Omex93-A2 bx	Ocen	0.765	-21.6915	-21.3986
Omex93-A2 bx	Ocen	0.772	-21.3845	-21.0776
Omex93-A2 bx	Ocen	0.798	-22.7306	-22.5053
Omex93-A2 bx	Ocen	0.8	-20.8144	-20.4888
Omex93-A2 bx	Ocen	0.803	-22.0696	-21.8111
Omex93-A2 bx	Ocen	0.807	-25.9492	-25.8944
Omex93-A2 bx	Ocen	0.829	-23.1535	-22.9585
Omex93-A2 bx	Ocen	0.852	-24.6946	-24.581
Omex93-A2 bx	Ocen	0.892	-24.1154	-23.98
Omex93-A2 bx	Ocen	0.898	-21.5995	-21.3477
Omex93-A2 bx	Ocen	0.899	-22.5074	-22.2982
Omex93-A2 bx	Ocen	0.921	-21.5572	-21.3101
Omex93-A2 bx	Ocen	1.014	-23.3542	-23.2045
Omex93-A2 bx	Ocen	1.081	-23.2334	-23.0887
Omex93-A2 bx	Sram	0.206	-21.7932	-20.5385
Omex93-A2 bx	Sram	0.247	-21.0362	-19.8838
Omex93-A2 bx	Sram	0.28	-26.6402	-26.5802	OUT
Omex93-A2 bx	Sram	0.282	-23.3222	-22.7143
Omex93-A2 bx	Sram	0.284	-27.074	-27.0861	OUT
Omex93-A2 bx	Sram	0.324	-21.154	-20.3306
Omex93-A2 bx	Sram	0.455	-24.3362	-24.0794
Omex93-A2 bx	Sram	0.542	-22.8232	-22.4904
Omex93-A2 bx	Sram	0.55	-22.4372	-22.0793
Omex93-A2 bx	Sram	0.557	-22.197	-21.8254
Omex93-A2 bx	Sram	0.574	-21.882	-21.4986
Omex93-A2 bx	Sram	0.782	-21.679	-21.3922
Omex93-A2 bx	Sram	1.263	-21.6672	-21.4928
Omex93-A2 bx	Selon	0.294	-21.5116	-20.6473
Omex93-A2 bx	Selon	0.487	-25.2076	-25.0472
Omex93-A2 bx	Selon	0.599	-24.1036	-23.8963
Omex93-A2 bx	Selon	0.959	-21.3196	-21.0724
Omex93-A2 bx	Selon	1.012	-22.4556	-22.2686
Omex93-A2 bx	Selon	1.265	-24.0496	-23.9533
Omex93-A2 bx	Smira	0.307	-21.8912	-21.1258
Omex93-A2 bx	Smira	0.393	-20.712	-19.9995
Omex93-A2 bx	Smira	0.439	-20.0962	-19.4041
Omex93-A2 bx	Smira	0.453	-21.5312	-21.0015
Omex93-A2 bx	Smira	0.531	-23.5226	-23.2393
Omex93-A2 bx	Smira	0.532	-22.3062	-21.9246
Omex93-A2 bx	Smira	0.549	-23.6006	-23.3335
Omex93-A2 bx	Smira	0.571	-22.1312	-21.7644
Omex93-A2 bx	Smira	0.605	-22.6902	-22.3851
Omex93-A2 bx	Smira	0.633	-21.9496	-21.6089
Omex93-A2 bx	Smira	0.712	-22.4212	-22.1487
Omex93-A2 bx	Smira	0.735	-23.9312	-23.7546
Omex93-A2 bx	Smira	0.799	-22.8272	-22.6073
Omex93-A2 bx	Smira	0.846	-18.6302	-18.2148	OUT
Omex93-A2 bx	Smira	0.852	-21.9372	-21.6878
Omex93-A2 bx	Smira	0.91	-22.5652	-22.3613
Omex93-A2 bx	Smira	1.054	-22.3422	-22.1585
Omex93-A2 bx	Smira	1.279	-23.7512	-23.6463
PE275-6	Ocen	0.25	-21.7997	-20.8092
PE275-6	Ocen	0.278	-28.8585	-29.1709	OUT
PE275-6	Ocen	0.317	-25.6036	-25.402
PE275-6	Ocen	0.336	-22.1376	-21.4805
PE275-6	Ocen	0.349	-23.3856	-22.9177
PE275-6	Ocen	0.355	-25.1366	-24.9
PE275-6	Ocen	0.357	-23.763	-23.3545
PE275-6	Ocen	0.364	-25.4906	-25.3043
PE275-6	Ocen	0.372	-23.7517	-23.3603
PE275-6	Ocen	0.392	-23.3926	-22.9827
PE275-6	Ocen	0.395	-25.486	-25.3154
PE275-6	Ocen	0.438	-26.2896	-26.2182
PE275-6	Ocen	0.449	-21.534	-20.9994
PE275-6	Ocen	0.46	-24.6296	-24.4038
PE275-6	Ocen	0.47	-20.5927	-19.9967
PE275-6	Ocen	0.489	-23.46	-23.1446
PE275-6	Ocen	0.508	-23.6626	-23.3774
PE275-6	Ocen	0.512	-21.9106	-21.4793
PE275-6	Ocen	0.54	-21.437	-20.992
PE275-6	Ocen	0.591	-22.9276	-22.632
PE275-6	Ocen	0.609	-22.2805	-21.9487
PE275-6	Ocen	0.618	-21.1927	-20.7908
PE275-6	Ocen	0.64	-22.4715	-22.1696
PE275-6	Ocen	0.642	-25.1725	-25.0511
PE275-6	Ocen	0.673	-22.0736	-21.7623
PE275-6	Ocen	0.681	-21.0176	-20.6443
PE275-6	Ocen	0.762	-20.9506	-20.6155
PE275-6	Ocen	0.763	-21.159	-20.8358
PE275-6	Ocen	0.776	-21.6856	-21.3968
PE275-6	Ocen	1.003	-20.9965	-20.7471
PE275-6	Ocen	1.038	-19.2746	-18.965
PE275-6	Ocen	1.208	-19.6036	-19.3503
PE275-6	Ocen	1.366	-19.1135	-18.8756
PE275-6	Ocen	1.731	-21.7426	-21.6182
PE275-6	Sram	0.118	-27.2656	-27.4018	BCO
PE275-6	Sram	0.149	-26.4527	-26.2519	BCO
PE275-6	Sram	0.198	-27.0626	-27.0784	BCO
PE275-6	Sram	0.218	-24.6266	-24.0933
PE275-6	Sram	0.275	-35.2196	-36.6187	OUT
PE275-6	Sram	0.288	-22.5032	-21.7779
PE275-6	Sram	0.296	-20.7442	-19.7667
PE275-6	Sram	0.324	-27.111	-27.1266
PE275-6	Sram	0.325	-20.5476	-19.642
PE275-6	Sram	0.358	-28.8186	-29.0474
PE275-6	Sram	0.396	-26.2568	-26.1733
PE275-6	Sram	0.449	-26.2608	-26.1885
PE275-6	Sram	0.473	-26.9456	-26.9406
PE275-6	Sram	0.491	-24.0117	-23.7467
PE275-6	Sram	0.505	-28.877	-29.0385
PE275-6	Sram	0.51	-25.9868	-25.9006
PE275-6	Sram	0.511	-21.9072	-21.4747
PE275-6	Sram	0.519	-23.6682	-23.39
PE275-6	Sram	0.532	-23.2378	-22.9319
PE275-6	Sram	0.537	-25.62	-25.5089
PE275-6	Sram	0.561	-23.277	-22.9912
PE275-6	Sram	0.577	-24.4356	-24.2446
PE275-6	Sram	0.588	-27.1606	-27.1723
PE275-6	Sram	0.598	-23.5072	-23.2568
PE275-6	Sram	0.613	-20.803	-20.3704
PE275-6	Sram	0.697	-22.7967	-22.5408
PE275-6	Sram	0.78	-23.7256	-23.5486
PE275-6	Sram	0.781	-25.7006	-25.6305
PE275-6	Sram	0.782	-23.5952	-23.4117
PE275-6	Sram	0.811	-21.4446	-21.1564
PE275-6	Sram	0.825	-26.2657	-26.2283
PE275-6	Sram	0.83	-24.234	-24.0939
PE275-6	Sram	0.862	-23.3008	-23.1208
PE275-6	Sram	0.983	-23.2658	-23.1074
PE275-9	Ocen	0.225	-22.884	-21.9941
PE275-9	Ocen	0.28	-22.1736	-21.3692
PE275-9	Ocen	0.306	-24.7646	-24.4284
PE275-9	Ocen	0.313	-22.8743	-22.2698
PE275-9	Ocen	0.315	-23.0193	-22.4403
PE275-9	Ocen	0.325	-26.039	-25.9041
PE275-9	Ocen	0.401	-22.757	-22.2869
PE275-9	Ocen	0.425	-25.1126	-24.9165
PE275-9	Ocen	0.476	-22.734	-22.3426
PE275-9	Ocen	0.487	-20.024	-19.3997
PE275-9	Ocen	0.493	-21.8286	-21.372
PE275-9	Ocen	0.495	-24.8433	-24.6537
PE275-9	Ocen	0.521	-20.9706	-20.4692
PE275-9	Ocen	0.526	-26.8496	-26.8372
PE275-9	Ocen	0.554	-22.102	-21.7208
PE275-9	Ocen	0.564	-23.0796	-22.7803
PE275-9	Ocen	0.607	-23.3083	-23.0479
PE275-9	Ocen	0.616	-26.3773	-26.3341
PE275-9	Ocen	0.618	-23.4846	-23.2413
PE275-9	Ocen	0.642	-21.948	-21.6123
PE275-9	Ocen	0.644	-21.9866	-21.6546
PE275-9	Ocen	0.645	-21.909	-21.5724
PE275-9	Ocen	0.673	-20.9513	-20.5691
PE275-9	Ocen	0.677	-24.069	-23.8849
PE275-9	Ocen	0.691	-20.4506	-20.0482
PE275-9	Ocen	0.715	-25.1113	-24.9994
PE275-9	Ocen	0.732	-28.891	-29.0003	OUT
PE275-9	Ocen	0.738	-22.3156	-22.0472
PE275-9	Ocen	0.751	-23.4016	-23.1992
PE275-9	Ocen	0.803	-25.5563	-25.4806
PE275-9	Ocen	0.841	-21.3676	-21.0863
PE275-9	Ocen	0.862	-23.1086	-22.9192
PE275-9	Ocen	0.902	-21.751	-21.5074
PE275-9	Ocen	0.915	-21.8	-21.5623
PE275-9	Ocen	0.962	-21.8116	-21.5865
PE275-9	Ocen	1.005	-20.8226	-20.5665
PE275-9	Ocen	1.204	-22.3636	-22.2043
PE275-9	Sram	0.223	-21.9713	-20.8721
PE275-9	Sram	0.278	-21.8378	-20.9702
PE275-9	Sram	0.335	-23.4936	-23.0182
PE275-9	Sram	0.351	-23.3786	-22.9128
PE275-9	Sram	0.402	-22.1793	-21.6466
PE275-9	Sram	0.415	-23.9038	-23.5735
PE275-9	Sram	0.419	-22.9588	-22.5323
PE275-9	Sram	0.46	-23.0086	-22.6285
PE275-9	Sram	0.479	-21.9238	-21.4613
PE275-9	Sram	0.489	-20.2618	-19.6615
PE275-9	Sram	0.502	-23.2266	-22.8999
PE275-9	Sram	0.511	-25.9376	-25.8474
PE275-9	Sram	0.537	-24.1053	-23.8723
PE275-9	Sram	0.591	-29.3218	-29.4904	OUT
PE275-9	Sram	0.718	-25.3188	-25.2196
PE275-9	Sram	0.727	-24.1338	-23.9669
PE275-9	Sram	0.791	-24.6856	-24.5623
PE275-9	Sram	0.912	-21.2568	-20.9934
PE275-9	Sram	0.988	-22.386	-22.1913
PE275-9	Sram	1.251	-22.813	-22.6747
PE275-9	Sram	1.303	-23.808	-23.7069
PE275-9	Sram	1.551	-22.7698	-22.6578
PE275-9	Sram	2.926	-22.4508	-22.3877
PE275-9	Selon	0.144	-23.3784	-21.9855	BCO
PE275-9	Selon	0.164	-23.0094	-21.7221	BCO
PE275-9	Selon	0.401	-26.3595	-26.2885
PE275-9	Selon	0.468	-22.5275	-22.1095
PE275-9	Selon	0.49	-22.5514	-22.156
PE275-9	Selon	0.501	-24.956	-24.7786
PE275-9	Selon	0.528	-22.4385	-22.0646
PE275-9	Selon	0.561	-21.4685	-21.0438
PE275-9	Selon	0.595	-24.923	-24.7733
PE275-9	Selon	0.665	-21.966	-21.6438
PE275-9	Selon	0.698	-25.1295	-25.0158
PE275-9	Selon	0.801	-22.234	-21.9835
T89-15bx	Ocen	0.203	-28.2092	-28.5059
T89-15bx	Ocen	0.204	-28.7208	-29.1405
T89-15bx	Ocen	0.251	-28.9356	-29.3025
T89-15bx	Ocen	0.279	-24.5578	-24.1491
T89-15bx	Ocen	0.297	-26.5532	-26.4837
T89-15bx	Ocen	0.313	-25.2526	-24.9966
T89-15bx	Ocen	0.385	-22.9902	-22.5253
T89-15bx	Ocen	0.399	-27.2106	-27.2341
T89-15bx	Ocen	0.411	-20.8808	-20.221
T89-15bx	Ocen	0.413	-29.286	-29.5311
T89-15bx	Ocen	0.43	-23.3562	-22.9825
T89-15bx	Ocen	0.436	-26.1436	-26.0571
T89-15bx	Ocen	0.441	-23.0072	-22.6089
T89-15bx	Ocen	0.49	-26.3143	-26.2533
T89-15bx	Ocen	0.493	-23.9962	-23.731
T89-15bx	Ocen	0.521	-21.2218	-20.7413
T89-15bx	Ocen	0.562	-22.5128	-22.169
T89-15bx	Ocen	0.574	-23.405	-23.1357
T89-15bx	Ocen	0.585	-20.8182	-20.3645
T89-15bx	Ocen	0.608	-22.5156	-22.1998
T89-15bx	Ocen	0.637	-21.0598	-20.6618
T89-15bx	Ocen	0.639	-23.7592	-23.5428
T89-15bx	Ocen	0.712	-24.16	-23.991
T89-15bx	Ocen	0.718	-27.1976	-27.2093
T89-15bx	Ocen	0.718	-23.1872	-22.9623
T89-15bx	Ocen	0.744	-25.7063	-25.6328
T89-15bx	Ocen	0.747	-22.6992	-22.4559
T89-15bx	Ocen	0.781	-23.71	-23.5324
T89-15bx	Ocen	0.786	-21.4312	-21.1326
T89-15bx	Ocen	0.836	-27.8673	-27.9109
T89-15bx	Ocen	0.876	-22.2403	-22.0126
T89-15bx	Ocen	0.965	-23.023	-22.851
T89-15bx	Ocen	1.169	-21.7642	-21.5787
T89-15bx	Ocen	1.206	-21.305	-21.1096
T89-15bx	Ocen	1.553	-25.4893	-25.4494
T89-15bx	Ocen	1.586	-22.8053	-22.6968
T89-15bx	Sram	0.203	-28.2092	-28.5059
T89-15bx	Sram	0.222	-25.4258	-25.0798
T89-15bx	Sram	0.229	-22.7518	-21.8527
T89-15bx	Sram	0.243	-21.998	-21.0124
T89-15bx	Sram	0.245	-29.8574	-30.4149
T89-15bx	Sram	0.25	-26.6918	-26.6331
T89-15bx	Sram	0.266	-26.8784	-26.8569
T89-15bx	Sram	0.297	-26.5532	-26.4837
T89-15bx	Sram	0.303	-25.6894	-25.4901
T89-15bx	Sram	0.338	-23.1154	-22.594
T89-15bx	Sram	0.341	-30.044	-30.4485
T89-15bx	Sram	0.385	-22.9902	-22.5253
T89-15bx	Sram	0.417	-21.6332	-21.0638
T89-15bx	Sram	0.421	-25.8974	-25.7816
T89-15bx	Sram	0.441	-23.0072	-22.6089
T89-15bx	Sram	0.459	-23.8258	-23.5228
T89-15bx	Sram	0.515	-25.1174	-24.9589
T89-15bx	Sram	0.52	-26.6702	-26.6427
T89-15bx	Sram	0.543	-23.193	-22.8903
T89-15bx	Sram	0.547	-23.3772	-23.0914
T89-15bx	Sram	0.585	-20.8182	-20.3645
T89-15bx	Sram	0.587	-23.0178	-22.7266
T89-15bx	Sram	0.587	-27.001	-27.0011
T89-15bx	Sram	0.647	-23.0014	-22.7379
T89-15bx	Sram	0.69	-23.3362	-23.1107
T89-15bx	Sram	0.703	-28.925	-29.0411
T89-15bx	Sram	0.747	-22.6992	-22.4559
T89-15bx	Sram	0.769	-20.1902	-19.8165
T89-15bx	Sram	0.878	-21.9014	-21.658
T89-15bx	Sram	0.882	-25.4494	-25.3757
T89-15bx	Sram	0.89	-29.2494	-29.3553
T89-15bx	Sram	1.148	-22.7628	-22.6098
T89-15bx	Sram	1.217	-22.667	-22.5197
T89-15bx	Sram	1.264	-24.0444	-23.9478
T89-15bx	Sram	1.323	-22.0094	-21.8538
64PE428-1-6	Ocen	0.183	-25.5996	-25.2079	OUT
64PE428-1-6	Ocen	0.24	-23.1578	-22.3894
64PE428-1-6	Ocen	0.328	-21.7132	-20.9789
64PE428-1-6	Ocen	0.333	-22.4948	-21.8798
64PE428-1-6	Ocen	0.36	-22.0212	-21.3988
64PE428-1-6	Ocen	0.367	-21.3688	-20.68
64PE428-1-6	Ocen	0.373	-19.8494	-18.9905
64PE428-1-6	Ocen	0.376	-22.1688	-21.5937
64PE428-1-6	Ocen	0.418	-19.874	-19.1199
64PE428-1-6	Ocen	0.466	-22.6382	-22.2286
64PE428-1-6	Ocen	0.467	-22.4994	-22.0778
64PE428-1-6	Ocen	0.477	-22.228	-21.7912
64PE428-1-6	Ocen	0.477	-21.433	-20.9234
64PE428-1-6	Ocen	0.484	-22.073	-21.6291
64PE428-1-6	Ocen	0.487	-23.352	-23.0256
64PE428-1-6	Ocen	0.49	-21.0934	-20.5684
64PE428-1-6	Ocen	0.5	-20.1554	-19.5602
64PE428-1-6	Ocen	0.513	-21.7336	-21.2882
64PE428-1-6	Ocen	0.556	-21.1328	-20.678
64PE428-1-6	Ocen	0.583	-22.3974	-22.0584
64PE428-1-6	Ocen	0.586	-21.8756	-21.5002
64PE428-1-6	Ocen	0.611	-24.9872	-24.8462	OUT
64PE428-1-6	Ocen	0.657	-22.5682	-22.2809
64PE428-1-6	Ocen	0.657	-22.7612	-22.4864
64PE428-1-6	Ocen	0.662	-21.4956	-21.1416
64PE428-1-6	Ocen	0.675	-21.1818	-20.8153
64PE428-1-6	Ocen	0.744	-22.1	-21.8216
64PE428-1-6	Ocen	0.765	-24.206	-24.0518
64PE428-1-6	Ocen	0.772	-24.019	-23.8561
64PE428-1-6	Ocen	0.773	-22.633	-22.3947
64PE428-1-6	Ocen	0.775	-21.1064	-20.7857
64PE428-1-6	Ocen	0.787	-21.5306	-21.2377
64PE428-1-6	Ocen	0.823	-22.817	-22.6033
64PE428-1-6	Ocen	0.944	-21.9836	-21.7616
64PE428-1-6	Ocen	1.331	-21.639	-21.4729
64PE428-1-6	Iacul	0.197	-24.2696	-23.574	BCO
64PE428-1-6	Iacul	0.243	-30.6746	-31.3987
64PE428-1-6	Iacul	0.33	-26.613	-26.5596
64PE428-1-6	Iacul	0.34	-19.5024	-18.5027
64PE428-1-6	Iacul	0.389	-28.185	-28.3208
64PE428-1-6	Iacul	0.405	-24.4594	-24.181
64PE428-1-6	Iacul	0.412	-26.432	-26.3709
64PE428-1-6	Iacul	0.413	-21.7074	-21.1398
64PE428-1-6	Iacul	0.417	-26.117	-26.0233
64PE428-1-6	Iacul	0.424	-22.1946	-21.694
64PE428-1-6	Iacul	0.471	-25.6136	-25.4849
64PE428-1-6	Iacul	0.479	-22.558	-22.1533
64PE428-1-6	Iacul	0.484	-25.2094	-25.0481
64PE428-1-6	Iacul	0.485	-26.0994	-26.0184
64PE428-1-6	Iacul	0.507	-25.758	-25.6516
64PE428-1-6	Iacul	0.512	-23.426	-23.1231
64PE428-1-6	Iacul	0.515	-23.6874	-23.4084
64PE428-1-6	Iacul	0.532	-26.9366	-26.9314
64PE428-1-6	Iacul	0.538	-23.2776	-22.9786
64PE428-1-6	Iacul	0.568	-25.374	-25.2508
64PE428-1-6	Iacul	0.575	-21.3144	-20.8893
64PE428-1-6	Iacul	0.618	-25.0194	-24.8823
64PE428-1-6	Iacul	0.618	-24.335	-24.1506
64PE428-1-6	Iacul	0.622	-22.836	-22.5498
64PE428-1-6	Iacul	0.667	-19.9534	-19.5039
64PE428-1-6	Iacul	0.693	-24.184	-24.0115
64PE428-1-6	Iacul	0.7	-25.2614	-25.156
64PE428-1-6	Iacul	0.746	-22.4144	-22.1546
64PE428-1-6	Iacul	0.781	-19.4984	-19.0935
64PE428-1-6	Iacul	0.98	-28.155	-28.2041
64PE428-6-6	Ocen	0.153	-24.1688	-23.1666	BCO
64PE428-6-6	Ocen	0.208	-26.4148	-26.2755
64PE428-6-6	Ocen	0.275	-20.8042	-19.7496
64PE428-6-6	Ocen	0.398	-19.1282	-18.2487
64PE428-6-6	Ocen	0.416	-24.7132	-24.4699
64PE428-6-6	Ocen	0.536	-22.0312	-21.6305
64PE428-6-6	Ocen	0.544	-22.4502	-22.0891
64PE428-6-6	Ocen	0.547	-24.6972	-24.5155
64PE428-6-6	Ocen	0.871	-23.8708	-23.7202
64PE428-6-6	Ocen	0.92	-24.0982	-23.9663
64PE428-6-6	Ocen	0.967	-22.6492	-22.4615
